# Supplementary material
Source: publisher figshare collection journal article supplement (https://acs.figshare.com/ndownloader/files/3786685)

## Supplementary information

### Figure Caption

**Figure S1.** GFP expression of HABPs/pDNA polyplexes against HeLa (A), H9C2 (B), and CT26 (C) cells ( $3 \times 10^4$  cell/well) for 24 h. GFP expression was monitored by fluorescent microscopy (a) and the intensity (%) of GFP was quantified and normalized (b). The numbers in the bottom refer to the mean the weight ratios based on pDNA (gWiz-GFP, 500 ng). The scale bar (-) means 400  $\mu\text{m}$ . ABP, PEI 25k, and Lipofectamine<sup>®</sup> were used as control groups. (n = 3)

Figure S1.

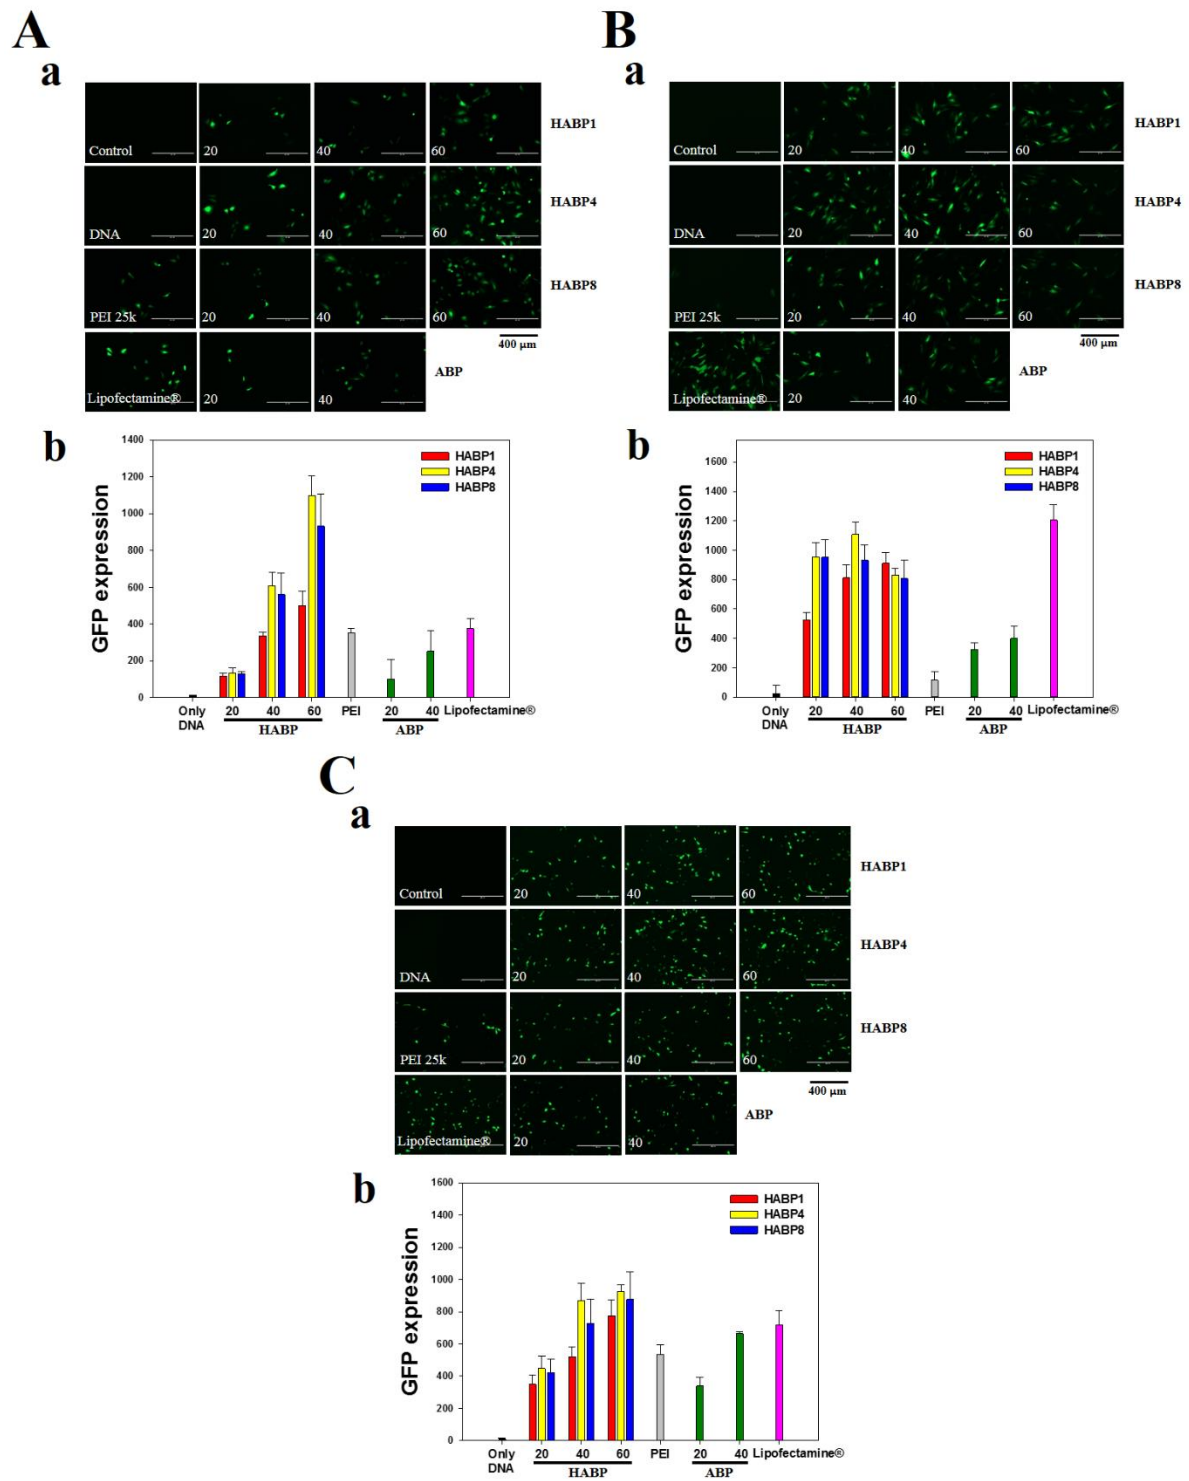

Supplement: Supplementary file 1 [file 3786685]
